# Supplementary material
Source: PubMed Central journal article supplement (PMC4694323)
Supplement: ijcem0008-18213-f4.pdf [file ijcem0008-18213-f4.pdf]

## Pre-operative N staging of GC by MDCT

**Table S1.** Diagnostic value of EUS in detection of involved lymph node in preoperative GC patients

| References  | No.  | TP  | FP | FN  | TN  | Sensitivity |             | Specificity |             | Likelihood ratios |             |       |             | Diagnostic Odds Ratio |             |
|-------------|------|-----|----|-----|-----|-------------|-------------|-------------|-------------|-------------------|-------------|-------|-------------|-----------------------|-------------|
|             |      |     |    |     |     | V           | 95% CI      | V           | 95% CI      | LR+               |             | LR-   |             | V                     | 95% CI      |
| Feng XY     | 610  | 307 | 45 | 118 | 140 | 0.722       | 0.677-0.764 | 0.757       | 0.688-0.817 | 2.970             | 2.288-3.855 | 0.367 | 0.308-0.437 | 8.094                 | 5.440-12.04 |
| Hwang SW    | 247  | 16  | 6  | 67  | 158 | 0.193       | 0.114-0.294 | 0.963       | 0.922-0.986 | 5.269             | 2.141-12.96 | 0.838 | 0.751-0.935 | 6.289                 | 2.358-16.77 |
| Ahn HS      | 71   | 1   | 2  | 5   | 63  | 0.167       | 0.004-0.641 | 0.969       | 0.893-0.996 | 5.417             | 0.571-51.40 | 0.860 | 0.600-1.233 | 6.300                 | 0.483-82.10 |
| Park SR     | 38   | 21  | 2  | 10  | 5   | 0.677       | 0.486-0.833 | 0.714       | 0.290-0.963 | 2.371             | 0.717-7.842 | 0.452 | 0.226-0.903 | 5.250                 | 0.864-31.90 |
| Bhandari S  | 48   | 14  | 1  | 6   | 27  | 0.700       | 0.457-0.881 | 0.964       | 0.817-0.999 | 19.60             | 2.800-137.2 | 0.311 | 0.159-0.610 | 63.00                 | 6.889-576.2 |
| Pooled data | 1014 |     |    |     |     | 0.635       | 0.594-0.675 | 0.875       | 0.841-0.904 | 3.663             | 2.293-5.854 | 0.532 | 0.302-0.936 | 8.080                 | 5.678-11.50 |

GC, Gastric Cancer; EUS, Endoscopic ultrasonography; V, Value; CI, Confidence interval; LR, Likelihood ratio; TP, True positive; FP, False Positive; TN, True Negative; FN, False Negative.
